# Supplementary material for: Assessment of T-cell Reactivity to the SARS-CoV-2 Omicron Variant by Immunized Individuals
Source: PubMed Central journal article supplement (PMC9034402; doi:10.1001/jamanetworkopen.2022.10871), 2022-04-22
Supplement: jamanetwopen-e2210871-s001.pdf [file jamanetwopen-e2210871-s001.pdf]

## Supplemental Online Content

De Marco L, D'Orso S, Pirronello M, et al. Assessment of T-cell reactivity to the SARS-CoV-2 Omicron variant by immunized individuals. *JAMA Netw Open*. 2022;5(4):e2210871. doi:10.1001/jamanetworkopen.2022.10871

**eFigure.** Reduced Recognition of Mutated Regions of the Spike Protein in the Omicron Variant

**eTable.** Flow Cytometry Reagents

This supplemental material has been provided by the authors to give readers additional information about their work.

**eFigure. Reduced Recognition of Mutated Regions of the Spike Protein in the Omicron Variant**

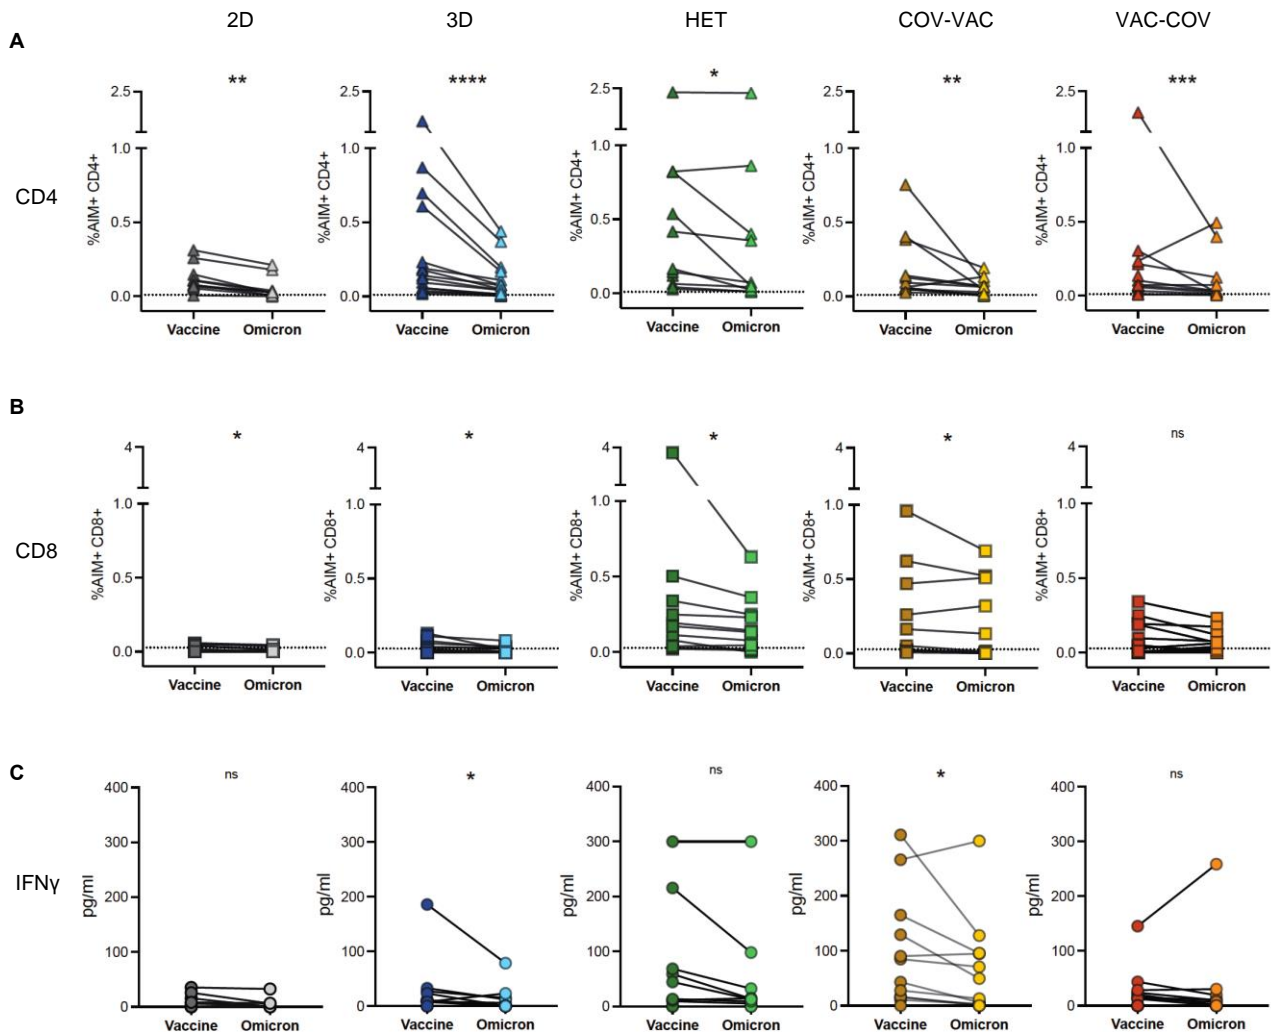

Freshly isolated lymphocytes were incubated with peptide pools encompassing the mutated regions of the Spike protein in the Omicron variant (Omicron), and with the reference peptide pool of the same region in the ancestral vaccine strain (Vaccine). Activated CD4+ (A) (CD69+CD40L+) and CD8+(B) (CD69+CD137+) cells were identified by flow cytometry, and IFN- $\gamma$  production was measured in the supernatants (C). Background T cell activation in paired unstimulated cultures was subtracted. Dotted lines indicate the threshold for positivity (median- 75th percentile of values from unstimulated cultures). 2D = 2 doses of vaccine; 3D: 3 doses mRNA vaccine; HET: 1-2 doses adenoviral vector vaccine + 1 dose mRNA; COV-VAC: covid convalescents subsequently vaccinated; VAC-COV Vaccinated individuals subsequently infected with SARS-CoV-2. Differences were assessed using Friedman rank sum test with omicron exposure (vaccine/omicron) and subject ID as fixed and random effects respectively. \*P < 0.05; \*\*P < 0.01; \*\*\*P < 0.001; \*\*\*\*P < 0.0001; N.S. Not Significant

**eTable. Flow Cytometry Reagents**

| Antibody | Fluorochrome | Clone     | Company        | Titer |
|----------|--------------|-----------|----------------|-------|
| CD14     | FITC         | REA599    | Miltenyi       | 1:100 |
| CD19     | FITC         | MAB-1118F | ImmunolScience | 1:30  |
| CD69     | BB700        | FN50      | Bect.Dick.     | 1:100 |
| CD154    | PE           | 24-31     | eBioscience    | 1:30  |
| CD4      | PECy5.5      | 13B8.2    | Coulter        | 1:100 |
| CD8      | BV605        | SK1       | Bect. Dick.    | 1:40  |
| CD137    | BUV395       | 4B4-1     | Bect. Dick.    | 1:30  |
| CD3      | BUV496       | UCHT1     | Bect.Dick.     | 1:50  |
| LD       | Near-IR      |           | ThermoFisher   | 1:60  |
